# Supplementary material for: Chronotype, Life’s Essential 8, and risk of cardiovascular disease: a prospective cohort study in UK Biobank
Source: Research Square preprint supplement (doi:10.21203/rs.3.rs-6718332/v1), 2025-06-03
Supplement: Supplementary file 1 [file e627ece5ba06044543d7b22e.docx]

Supplemental Material

Table of Contents

[Supplemental Figure 1. Study flow diagram 2](#_Toc195804879)

[Supplemental Figure 2. Self-reported chronotype weighted kappa and Spearman correlation estimates across multiple years 3](#_Toc195804880)

[Supplemental Table 1. Baseline characteristics in UK Biobank (2006-2010), comparing included vs. excluded participants 4](#_Toc195804881)

[Supplemental Table 2. UK Biobank Data-Field numbers of variables used in this study 5](#_Toc195804882)

[Supplemental Table 3. Participants chronotype and Life’s Essential 8 scores stratified by sex, N = 322,777 6](#_Toc195804883)

[Supplemental Table 4. Cross-sectional associations between chronotype and Life’s Essential 8 components stratified by sex, N = 322,277 7](#_Toc195804884)

[Supplemental Table 5. Chronotype and cardiovascular diseases risk in UK Biobank; excluding “Don’t Know” chronotype values, Number of participants included in this analysis = 294,089 8](#_Toc195804885)

[Supplemental Table 6. Chronotype and cardiovascular diseases risk in UK Biobank; end of follow-up as March 23, 2020 (UK national lockdown start date), N = 322,777 9](#_Toc195804886)

[Supplemental Table 7. Chronotype and risk of stroke subtypes in UK Biobank, N = 322,777 10](#_Toc195804887)

[Supplemental Table 8. Chronotype and risk of myocardial infarction subtypes in UK Biobank, N = 322,777 11](#_Toc195804888)

[Supplemental Table 9. Mediation role of Life’s Essential 8 components on the chronotype and incident cardiovascular diseases association, N = 244,554 12](#_Toc195804889)

[Supplemental Table 10. Mediation role of Life’s Essential 8 overall score on the chronotype and different cardiovascular diseases associations, N = 244,554 13](#_Toc195804890)

[Supplemental Table 11. Associations between chronotype and CVD risk among subgroups of the study sample, N = 322,777 14](#_Toc195804891)

[Supplemental Table 12. Chronotype and cardiovascular diseases risk in UK Biobank, N = 477,664 15](#_Toc195804892)

| Supplemental Figure 1. Study flow diagram |
| --- |
| 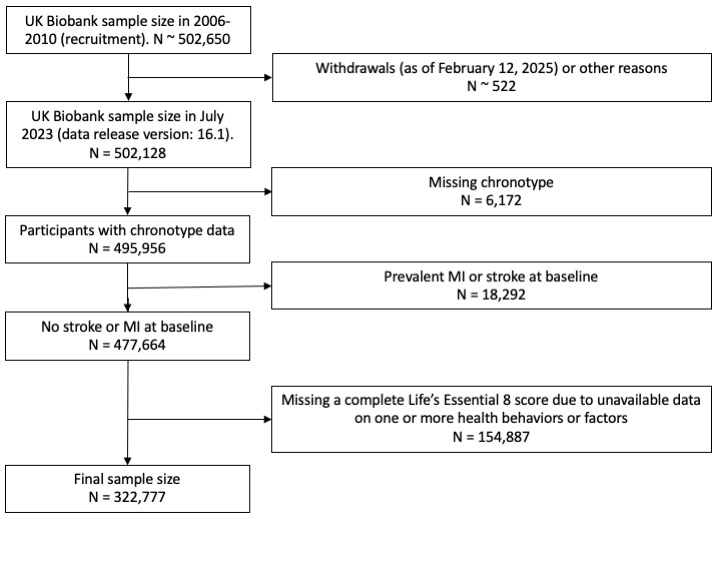 |
| Note: As associations with incident CVD were observed only for the “definitely evening” chronotype, compared to “intermediate,” the mediation analysis was limited to this comparison (N = 244,554). |

| Supplemental Figure 2. Self-reported chronotype weighted kappa and Spearman correlation estimates across multiple years |
| --- |
| 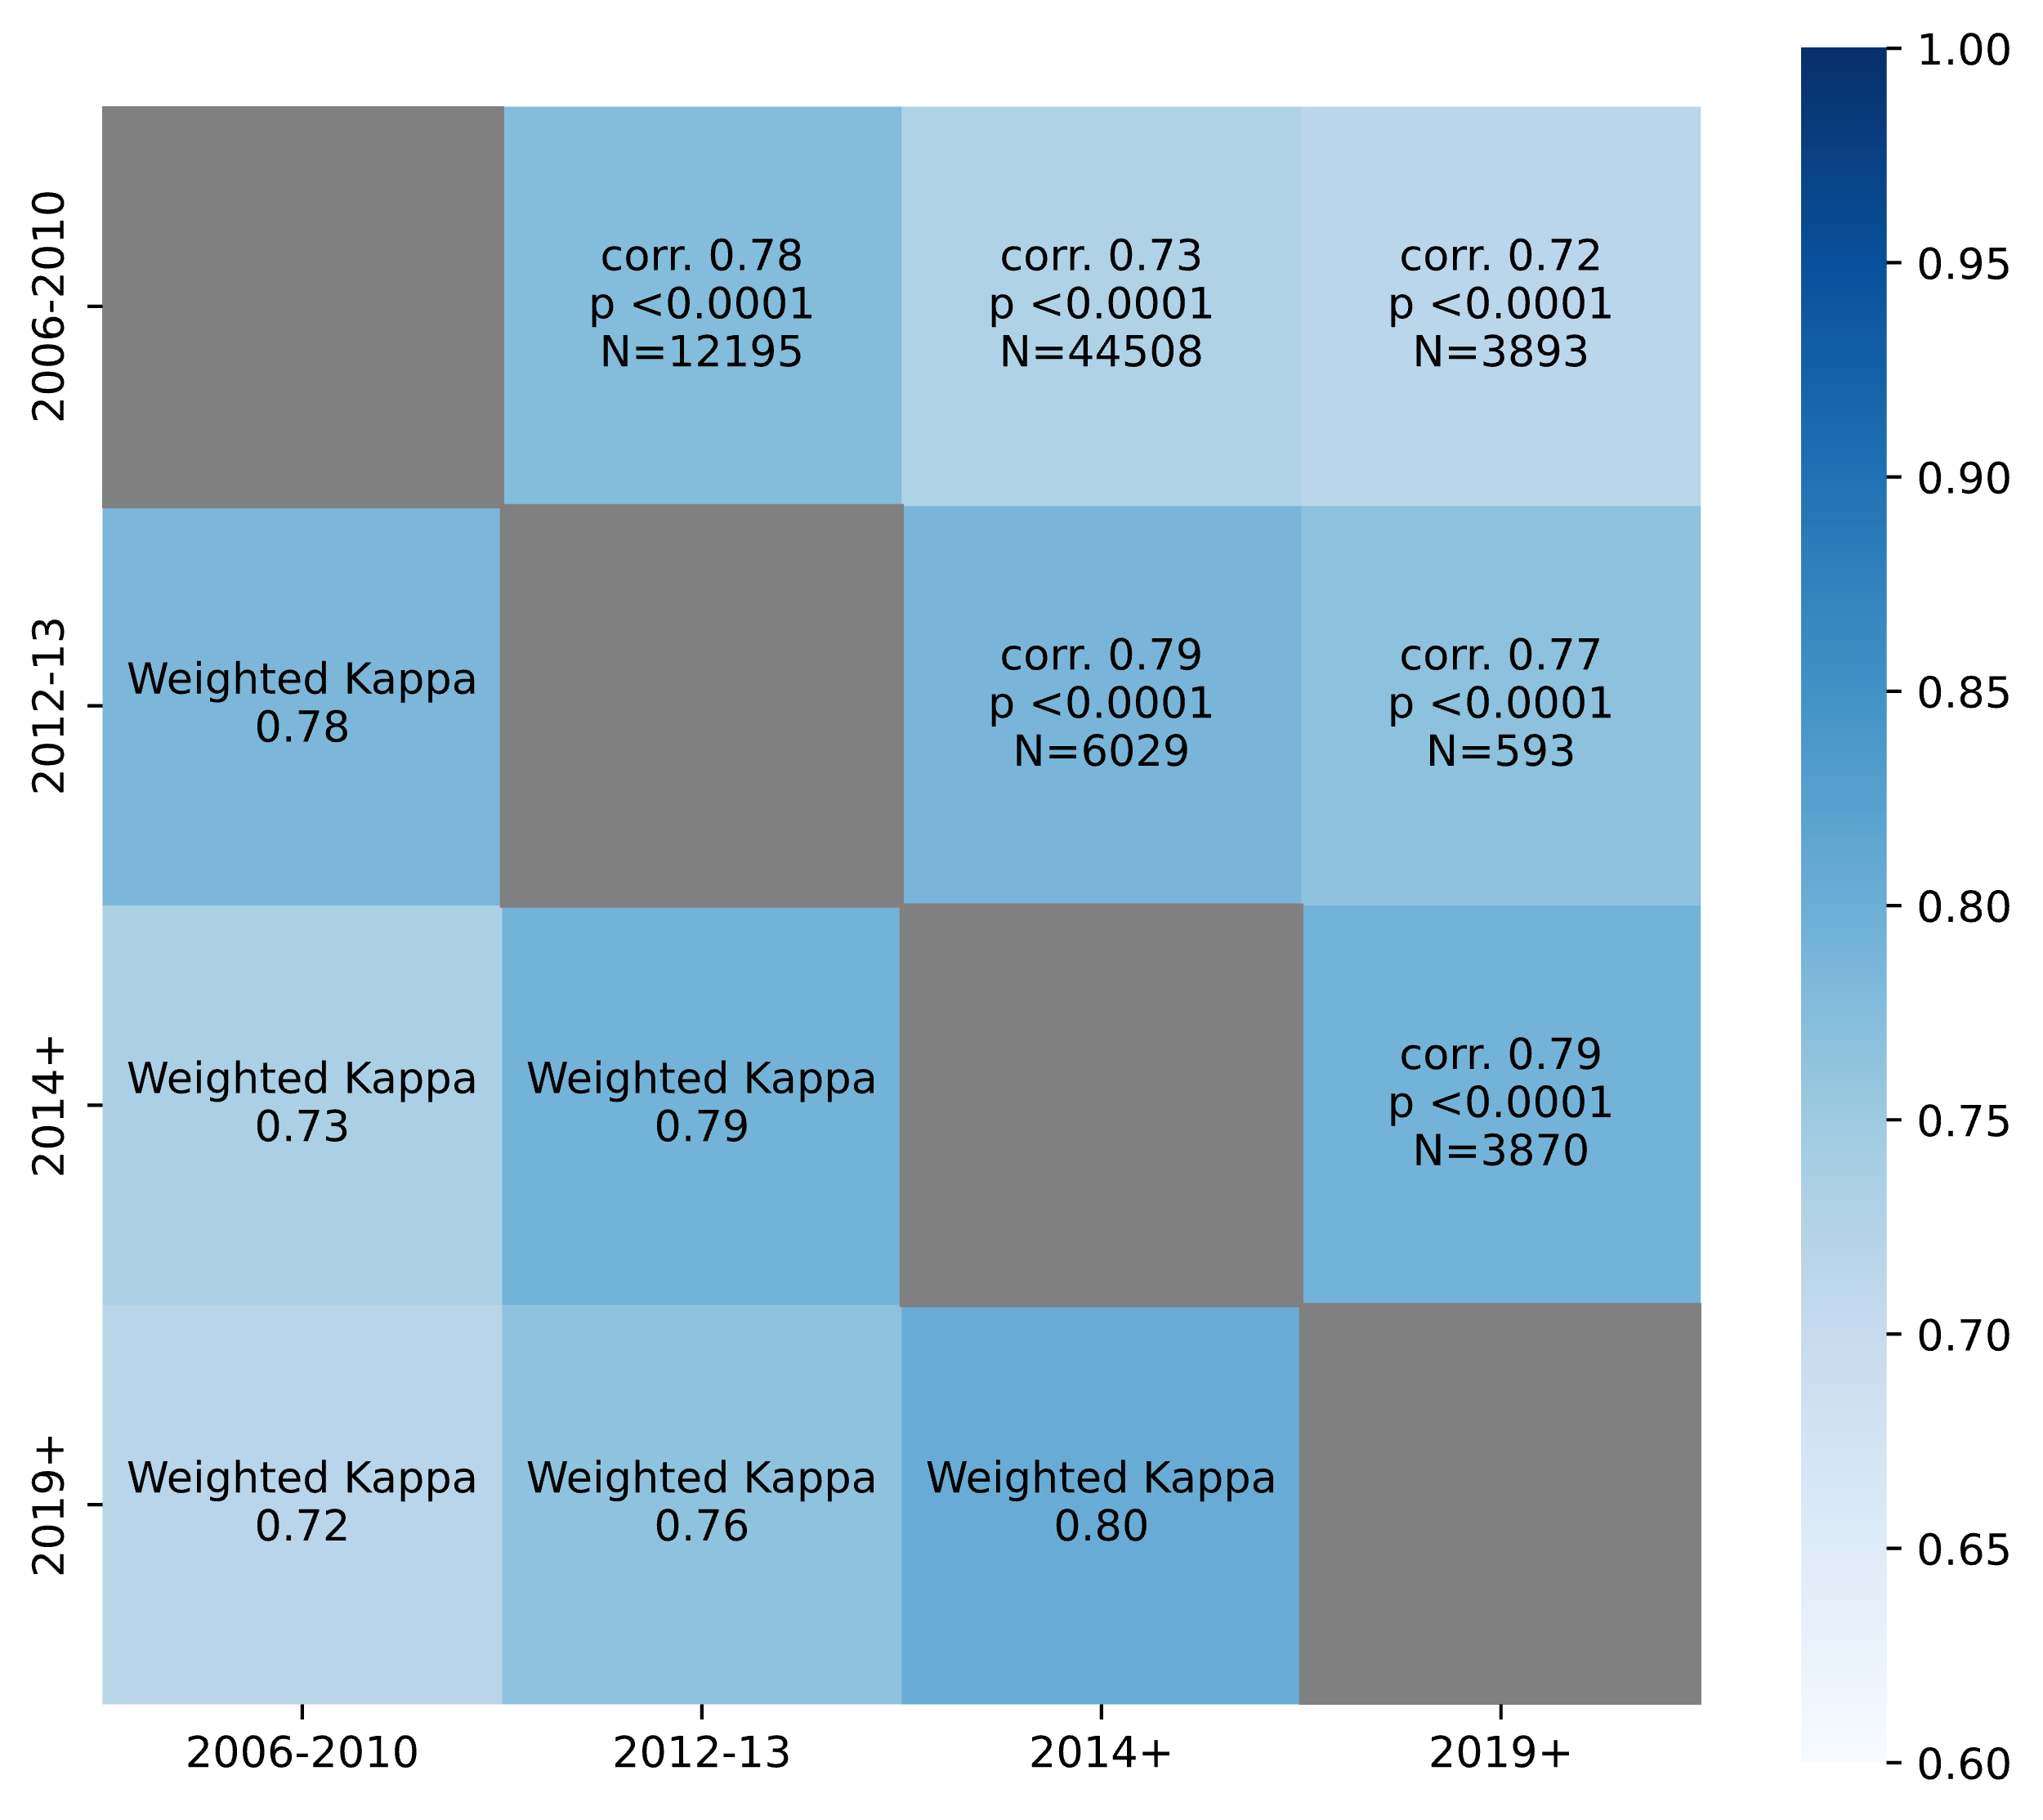 |
| In this analysis, we used chronotype with five levels (1: Definitely a 'morning' person, 2: More a 'morning' than 'evening' person, 3: Intermediate, 4: More an 'evening' than a 'morning' person, 5: Definitely an 'evening' person). Mean value of chronotype decreased from 2.61 in 2006-2010 to 2.46 in 2019+. Among the 3,893 participants with chronotype measured both at instance 0 (2006-2010) and instance 3 (2019+), 16.2% had a shift in their chronotype towards eveningness, 25.6% had a shift in their chronotype towards morningness, and 58.2% had an unchanged chronotype. Kappa estimates were calculated based on Fleiss-Cohen weights in SAS. |

| Supplemental Table 1. Baseline characteristics in UK Biobank (2006-2010), comparing included vs. excluded participants | | | | |
| --- | --- | --- | --- | --- |
|  | **UK Biobank total sample** | **Missing values %** | **Included in the study** | **Excluded from the study** |
|  | **N = 502128** | NA | **N = 322,777** | **N = 179,351** |
| **Age (years), Mean (SD)** | 57 (8.1) | NA | 56.5 (8.1) | 58 (8) |
| **White ethnic background, %** | 94.6 | NA | 95.8 | 92.5 |
| **Male, %** | 45.6 | NA | 47.0 | 43.0 |
| **Townsend deprivation index, Mean (SD)** | -1.3 (3.1) | NA | -1.5 (3) | -0.9 (3.3) |
| **College or University degree, %** | 32.1 | NA | 36.6 | 23.9 |
| **Family history of stroke or heart disease, %** | 58.8 | NA | 57.9 | 60.4 |
| **Employment/shift work, %** |  | NA |  |  |
| Employed, never/rarely shift work | 45.9 | NA | 49.5 | 39.5 |
| Employed, sometimes/usually/always shift work | 9.6 | NA | 9.3 | 10.2 |
| Retired/Other | 44.5 | NA | 41.3 | 50.3 |
| Life’s Essential 8 components * |  |  |  |  |
| **Diet score, Mean (SD)** | 53.2 (31.6) | 4.5 | 53.7 (31.6) | 52.3 (31.6) |
| **Physical activity score, Mean (SD)** | 71.7 (28.2) | 23.3 | 72.1 (27.8) | 69.6 (29.8) |
| **Nicotine exposure score, Mean (SD)** | 71.6 (30.9) | 0.7 | 72.2 (30.2) | 70.4 (32.1) |
| **Sleep health score, Mean (SD)** | 89 (19) | 0.9 | 89.9 (18.1) | 87.3 (20.5) |
| **Body weight score, Mean (SD)** | 68.8 (28.7) | 0.6 | 70.3 (28) | 66 (29.7) |
| **Blood lipids score, Mean (SD)** | 48 (29.1) | 6.6 | 47.7 (29.1) | 48.6 (29.3) |
| **Blood glucose score, Mean (SD)** | 89.3 (20.6) | 7.2 | 90.6 (19.5) | 86.5 (22.7) |
| **Blood pressure score, Mean (SD)** | 41.3 (32.1) | 0.3 | 42.5 (32.2) | 38.9 (31.7) |
| **Life’s Essential 8 overall score, Mean (SD)** | 67.2 (11.8) | 33.3 | 67.4 (11.7) | 62.9 (12.3) |
| * Life’s Essential 8 components were scored as points, with higher values reflecting closer adherence to recommended cardiovascular health behaviors and factors.  NA: Not applicable; We did not impute missing data for Life's Essential 8 components, so missing values are only reported for these. Sociodemographic data, with only a small proportion missing, were imputed using median and mode prior to table creation. | | | | |

| Supplemental Table 2. UK Biobank Data-Field numbers of variables used in this study | | |
| --- | --- | --- |
| **Variable** | **Data-Field** | **Notes on variable definition** |
| Chronotype | [1180](https://biobank.ndph.ox.ac.uk/ukb/field.cgi?id=1180) | In the primary analysis, “Do not know” responses were recategorized as “intermediate,” and both “More a ‘morning’ than ‘evening’ person” and “More an ‘evening’ than ‘morning’ person” were merged into this intermediate chronotype group. |
| Date of attending assessment center | [53](https://biobank.ndph.ox.ac.uk/ukb/field.cgi?id=53) | -- |
| Age | [34](https://biobank.ctsu.ox.ac.uk/crystal/field.cgi?id=34), [52](https://biobank.ctsu.ox.ac.uk/crystal/field.cgi?id=52) | -- |
| Ethnic background | [21000](https://biobank.ctsu.ox.ac.uk/crystal/field.cgi?id=21000) | -- |
| Sex | [31](https://biobank.ctsu.ox.ac.uk/crystal/field.cgi?id=31) | -- |
| Townsend deprivation index | [22189](https://biobank.ctsu.ox.ac.uk/crystal/field.cgi?id=22189) | -- |
| Education | [6138](https://biobank.ndph.ox.ac.uk/ukb/field.cgi?id=6138) | -- |
| Employment/shift work | [826](https://biobank.ndph.ox.ac.uk/ukb/field.cgi?id=826), [6142](https://biobank.ndph.ox.ac.uk/ukb/field.cgi?id=6142) | -- |
| Family history of stroke or heart disease | [20107](https://biobank.ctsu.ox.ac.uk/crystal/field.cgi?id=20107),  [20110](https://biobank.ctsu.ox.ac.uk/crystal/field.cgi?id=20110), [20111](https://biobank.ctsu.ox.ac.uk/crystal/field.cgi?id=20111) | This was based on parents and/or sibling history of disease information. |
| Study follow-up | [40000](https://biobank.ndph.ox.ac.uk/ukb/field.cgi?id=40000), [191](https://biobank.ndph.ox.ac.uk/ukb/field.cgi?id=191) | Date variables for study follow-up calculation. |
| Standard PRS for cardiovascular disease | [26223](https://biobank.ctsu.ox.ac.uk/crystal/field.cgi?id=26223) | -- |
| Genetic principal components | [22009](https://biobank.ctsu.ox.ac.uk/crystal/field.cgi?id=22009) | -- |
| CVD outcomes | [42000](https://biobank.ctsu.ox.ac.uk/crystal/field.cgi?id=42000), [42002](https://biobank.ctsu.ox.ac.uk/crystal/field.cgi?id=42002), [42004](https://biobank.ctsu.ox.ac.uk/crystal/field.cgi?id=42004), [42006](https://biobank.ctsu.ox.ac.uk/crystal/field.cgi?id=42006), [42008](https://biobank.ctsu.ox.ac.uk/crystal/field.cgi?id=42008), [42010](https://biobank.ctsu.ox.ac.uk/crystal/field.cgi?id=42010), [42012](https://biobank.ctsu.ox.ac.uk/crystal/field.cgi?id=42012) | These are validated UK Biobank algorithms. Development details and ICD-10 code lists are available from the UK Biobank Resource 460 (UK Biobank 2022). |
| **Life’s Essential 8 components** | | |
| Healthy diet score | [1289](https://biobank.ctsu.ox.ac.uk/crystal/field.cgi?id=1289), [1299](https://biobank.ctsu.ox.ac.uk/crystal/field.cgi?id=1299), [1309](https://biobank.ctsu.ox.ac.uk/crystal/field.cgi?id=1309), [1319](https://biobank.ctsu.ox.ac.uk/crystal/field.cgi?id=1319), [1329](https://biobank.ctsu.ox.ac.uk/crystal/field.cgi?id=1329), [1339](https://biobank.ctsu.ox.ac.uk/crystal/field.cgi?id=1339), [1349](https://biobank.ctsu.ox.ac.uk/crystal/field.cgi?id=1349), [1359](https://biobank.ctsu.ox.ac.uk/crystal/field.cgi?id=1359), [1369](https://biobank.ctsu.ox.ac.uk/crystal/field.cgi?id=1369), [1379](https://biobank.ctsu.ox.ac.uk/crystal/field.cgi?id=1379), [1389](https://biobank.ctsu.ox.ac.uk/crystal/field.cgi?id=1389) | We followed instructions from Rutten-Jacobs et al. (Rutten-Jacobs et al. 2018), and others (Pazoki et al. 2018; Wang et al. 2022). |
| Summed minutes activity | [22034](https://biobank.ndph.ox.ac.uk/ukb/field.cgi?id=22034) | -- |
| Nicotine exposure | [2897](https://biobank.ndph.ox.ac.uk/ukb/field.cgi?id=2897), [1259](https://biobank.ndph.ox.ac.uk/ukb/field.cgi?id=1259), [20116](https://biobank.ndph.ox.ac.uk/ukb/field.cgi?id=20116), [1249](https://biobank.ndph.ox.ac.uk/ukb/field.cgi?id=1249) | We followed the guidelines provided in a previous paper as outlined below: *‘We regard the participants who indicated “ smoked occasionally in the past” as equivalent to “Former smoker, quit 1–<5 years” [i.e., score =50]; We regard the participants who indicated “ just tried once or twice in the past” as equivalent to “Former smoker, quit ≥ 5 years” [i.e., score = 75]’* (Wang et al. 2023). |
| Sleep | [1160](https://biobank.ndph.ox.ac.uk/ukb/field.cgi?id=1160) | Values <2 and >14 hours/day were coded as missing. |
| Body mass index | [21001](https://biobank.ctsu.ox.ac.uk/crystal/field.cgi?id=21001) | This variable was used to create body weight score of LE8. |
| Blood lipids | [30690](https://biobank.ctsu.ox.ac.uk/crystal/field.cgi?id=30690), [30760](https://biobank.ctsu.ox.ac.uk/crystal/field.cgi?id=30760), [30780](https://biobank.ctsu.ox.ac.uk/crystal/field.cgi?id=30780), [30870](https://biobank.ctsu.ox.ac.uk/crystal/field.cgi?id=30870), [20003](https://biobank.ctsu.ox.ac.uk/crystal/field.cgi?id=20003) | Following treatments were used when subtracting 20 points for medication: simvastatin, pravastatin, fluvastatin, atorvastatin, rosuvastatin, ezetimibe, nicotinic acid product, or fenofibrate, following previous work (Tikkanen, Gustafsson, and Ingelsson 2018) |
| Blood glucose | [130708](https://biobank.ctsu.ox.ac.uk/crystal/field.cgi?id=130708), [30750](https://biobank.ctsu.ox.ac.uk/crystal/field.cgi?id=30750), [20003](https://biobank.ctsu.ox.ac.uk/crystal/field.cgi?id=20003) | Medications used when defining prevalent diabetes cases: insulin product, glucophage 500mg tablet, rosiglitazone 1mg / metformin 500mg tablet [supplemental table 1 of (Brown et al. 2023)]. |
| Blood pressure | [4080](https://biobank.ctsu.ox.ac.uk/crystal/field.cgi?id=4080), [93](https://biobank.ctsu.ox.ac.uk/crystal/field.cgi?id=93), [4079](https://biobank.ctsu.ox.ac.uk/crystal/field.cgi?id=4079), [94](https://biobank.ctsu.ox.ac.uk/crystal/field.cgi?id=94), [20003](https://biobank.ctsu.ox.ac.uk/crystal/field.cgi?id=20003) | We used the list of 218 hypertension medications published in Supplemental Table 2 of a previous UK Biobank study to create the blood pressure component (Elghazaly et al. 2023). |
| Algorithms for creating each Life’s Essential 8 component and the overall score are summarized in Table 1 of Lloyd-Jones et al., 2022, paper (Lloyd-Jones et al. 2022). | | |

| Supplemental Table 3. Participants chronotype and Life’s Essential 8 scores stratified by sex, N = 322,777 | | |
| --- | --- | --- |
|  | Female,  N = 171008 | Male,  N = 151769 |
| Chronotype |  |  |
| Definitely morning | 25.3 | 23.1 |
| Intermediate | 66.6 | 68.5 |
| Definitely evening | 8.1 | 8.4 |
| Life’s Essential 8 components * |  |  |
| Life’s Essential 8 overall score | 69.7 (11.7) | 64.7 (11.2) |
| Diet, Mean (SD) | 60.6 (30.1) | 45.9 (31.4) |
| Physical activity, Mean (SD) | 72 (27.6) | 72.3 (28) |
| nicotine exposure, Mean (SD) | 74.1 (29.4) | 70.1 (31) |
| Sleep health, Mean (SD) | 89.9 (18.2) | 89.9 (17.9) |
| Body weight, Mean (SD) | 72.8 (29.1) | 67.4 (26.5) |
| Blood lipids, Mean (SD) | 48.7 (29.7) | 46.6 (28.3) |
| Blood glucose, Mean (SD) | 91.4 (18.3) | 89.6 (20.8) |
| Blood pressure, Mean (SD) | 48.4 (33.8) | 35.9 (28.9) |
| * Life’s Essential 8 components were scored as points, with higher values reflecting closer adherence to recommended cardiovascular health behaviors and factors. | | |

| Supplemental Table 4. Cross-sectional associations between chronotype and Life’s Essential 8 components stratified by sex, N = 322,277 | | | | |
| --- | --- | --- | --- | --- |
|  | Female | | Male | |
|  | score <50 / Sample | PR (95% CI) * | score <50 / Sample | PR (95% CI) * |
| Diet score <50 | | | | |
| Definite morning | 8784 / 43232 | **0.85 (0.83, 0.87)** | 13314 / 34991 | **0.90 (0.89, 0.92)** |
| Intermediate | 28521 / 113886 | Ref. | 44604 / 103971 | Ref. |
| Definite evening | 3989 / 13890 | **1.07 (1.04, 1.10)** | 6370 / 12807 | **1.09 (1.07, 1.11)** |
| P-trend | 41294 / 171008 | **<.0001** | 64288 / 151769 | **<.0001** |
| Physical activity score <50 | |  |  |  |
| Definite morning | 9589 / 43232 | **0.89 (0.87, 0.91)** | 7739 / 34991 | **0.88 (0.86, 0.90)** |
| Intermediate | 28867 / 113886 | Ref. | 25901 / 103971 | Ref. |
| Definite evening | 4323 / 13890 | **1.14 (1.11, 1.17)** | 4185 / 12807 | **1.24 (1.21, 1.27)** |
| P-trend | 42779 / 171008 | **<.0001** | 37825 / 151769 | **<.0001** |
| Nicotine exposure score <50 | |  |  |  |
| Definite morning | 3866 / 43232 | **0.91 (0.88, 0.95)** | 4047 / 34991 | **0.93 (0.90, 0.96)** |
| Intermediate | 11548 / 113886 | Ref. | 13235 / 103971 | Ref. |
| Definite evening | 2564 / 13890 | **1.63 (1.57, 1.70)** | 2778 / 12807 | **1.47 (1.42, 1.52)** |
| P-trend | 17978 / 171008 | **<.0001** | 20060 / 151769 | **<.0001** |
| Sleep health score <50 | | | | |
| Definite morning | 3357 / 43232 | **1.29 (1.24, 1.34)** | 2492 / 34991 | **1.31 (1.25, 1.37)** |
| Intermediate | 6571 / 113886 | Ref. | 5434 / 103971 | Ref. |
| Definite evening | 1194 / 13890 | **1.38 (1.30, 1.46)** | 1085 / 12807 | **1.45 (1.37, 1.55)** |
| P-trend | 11122 / 171008 | **<.0001** | 9011 / 151769 | **0.0277** |
| Body weight score <50 | | | | |
| Definite morning | 9406 / 43232 | **1.04 (1.02, 1.06)** | 9195 / 34991 | **1.14 (1.11, 1.16)** |
| Intermediate | 23234 / 113886 | Ref. | 23454 / 103971 | Ref. |
| Definite evening | 3768 / 13890 | **1.21 (1.18, 1.24)** | 3327 / 12807 | **1.07 (1.04, 1.11)** |
| P-trend | 36408 / 171008 | **<.0001** | 35976 / 151769 | **<.0001** |
| Blood lipids score <50 | | | | |
| Definite morning | 24130 / 43232 | 0.99 (0.98, 1.00) | 20220 / 34991 | **0.99 (0.98, 0.997)** |
| Intermediate | 62062 / 113886 | Ref. | 61253 / 103971 | Ref. |
| Definite evening | 7603 / 13890 | 1.00 (0.99, 1.02) | 7616 / 12807 | 1.00 (0.98, 1.01) |
| P-trend | 93795 / 171008 | 0.0583 | 89089 / 151769 | **0.0259** |
| Blood glucose score <50 | | | | |
| Definite morning | 1505 / 43232 | 1.01 (0.96, 1.07) | 2431 / 34991 | **1.05 (1.01, 1.10)** |
| Intermediate | 3450 / 113886 | Ref. | 6066 / 103971 | Ref. |
| Definite evening | 612 / 13890 | **1.20 (1.11, 1.30)** | 933 / 12807 | **1.15 (1.08, 1.22)** |
| P-trend | 5567 / 171008 | **0.0137** | 9430 / 151769 | 0.4435 |
| Blood pressure score <50 | | | | |
| Definite morning | 19722 / 43232 | 1.01 (0.996, 1.02) | 21079 / 34991 | 1.00 (0.99, 1.01) |
| Intermediate | 48248 / 113886 | Ref. | 60056 / 103971 | Ref. |
| Definite evening | 5748 / 13890 | 0.98 (0.97, 1.00) | 6958 / 12807 | **0.98 (0.97, 0.998)** |
| P-trend | 73718 / 171008 | **0.0362** | 88093 / 151769 | 0.1079 |
| Life’s Essential 8 overall score <50 | | | | |
| Definite morning | 2069 / 43232 | **0.91 (0.87, 0.96)** | 3115 / 34991 | 0.98 (0.94, 1.01) |
| Intermediate | 5573 / 113886 | Ref. | 9183 / 103971 | Ref. |
| Definite evening | 1345 / 13890 | **1.97 (1.86, 2.09)** | 1939 / 12807 | **1.67 (1.60, 1.75)** |
| P-trend | 8987 / 171008 | **<.0001** | 14237 / 151769 | **<.0001** |
| * Adjusted for age, ethnic background, sex, Townsend deprivation index, education, family history of CVD, employment/shift work, along with mutual adjustment for the other seven LE8 components. For the Life’s Essential 8 overall score model, we did not perform mutual adjustment. *P*-trend was calculated by modeling chronotype as a continuous variable ranging from 1 to 3. P-interaction between sex and chronotype for Life’s Essential 8 overall score outcome was 0.0003. | | | | |

| Supplemental Table 5. Chronotype and cardiovascular diseases risk in UK Biobank; excluding “Don’t Know” chronotype values, Number of participants included in this analysis = 294,089 | | | | |
| --- | --- | --- | --- | --- |
|  | Chronotype  HR (95 CI) | | | *p*-trend |
|  | Definitely ‘morning’ | Intermediate | Definitely ‘evening’ |  |
| Cardiovascular disease |  |  |  |  |
| Cases / person-years | 4525 / 993796 | 9949 / 2414676 | 1483 / 338560 | 15957 / 3747032 |
| Model 1 * | 1.03 (0.99, 1.06) | Ref. | **1.16 (1.10, 1.23)** | **0.0360** |
| Model 2 † | 1.03 (0.99, 1.07) | Ref. | **1.15 (1.09, 1.22)** | 0.0613 |
| Model 2 + overall Life’s Essential 8 score | **1.04 (1.01, 1.08)** | Ref. | 1.05 (0.99, 1.11) | 0.2988 |
| Model 2 + all Life’s Essential 8 components | 1.03 (0.99, 1.07) | Ref. | **1.06 (1.00, 1.12)** | 0.9179 |
| Myocardial infarction (MI) |  |  |  |  |
| Cases / person-years | 2847 / 1000347 | 6257 / 2429313 | 940 / 340669 | 10044 / 3770329 |
| Model 1 * | 1.03 (0.99, 1.08) | Ref. | **1.16 (1.08, 1.24)** | 0.1610 |
| Model 2 † | 1.04 (0.99, 1.08) | Ref. | **1.15 (1.07, 1.23)** | 0.2290 |
| Model 2 + Life’s Essential 8 score | **1.05 (1.01, 1.10)** | Ref. | 1.03 (0.96, 1.10) | 0.1496 |
| Model 2 + all Life’s Essential 8 components | 1.03 (0.99, 1.08) | Ref. | 1.04 (0.97, 1.12) | 0.6944 |
| Stroke |  |  |  |  |
| Cases / person-years | 1861 / 1006106 | 4095 / 2441803 | 614 / 342682 | 5223 / 3790591 |
| Model 1 * | 1.01 (0.96, 1.07) | Ref. | **1.18 (1.09, 1.29)** | **0.0351** |
| Model 2 † | 1.01 (0.96, 1.07) | Ref. | **1.18 (1.08, 1.28)** | **0.0476** |
| Model 2 + Life’s Essential 8 score | 1.03 (0.97, 1.08) | Ref. | **1.09 (1.00, 1.19)** | 0.6220 |
| Model 2 + all Life’s Essential 8 components | 1.02 (0.96, 1.08) | Ref. | **1.09 (1.00, 1.19)** | 0.4361 |
| * Model 1: adjusted for age, ethnic background, sex, Townsend deprivation index, education, family history of CVD.  † Model 2: adjusted for covariates in model 1 along with employment/shift work.  The Life's Essential 8 score and its individual components are continuous measures developed in accordance with the American Heart Association guidelines. They range from 0 to 100 points, where a higher point indicates a better cardiovascular health. *P*-trend was calculated by modeling chronotype as a continuous variable ranging from 1 to 3.  Values in rows corresponding to models represent hazard ratios (95% CI) for the association between chronotype and outcome. | | | | |

| Supplemental Table 6. Chronotype and cardiovascular diseases risk in UK Biobank; end of follow-up as March 23, 2020 (UK national lockdown start date), N = 322,777 | | | | |
| --- | --- | --- | --- | --- |
|  | Chronotype  HR (95 CI) | | | *p*-trend |
|  | Definitely ‘morning’ | Intermediate | Definitely ‘evening’ |  |
| **Cardiovascular disease** |  |  |  |  |
| Cases / person-years | 3316 / 840178 | 8498 / 2348675 | 1124 / 286277 | 12938 / 3475130 |
| Model 1 * | 1.03 (0.99, 1.07) | Ref. | **1.20 (1.13, 1.28)** | 0.0783 |
| Model 2 † | 1.03 (0.99, 1.07) | Ref. | **1.19 (1.12, 1.27)** | 0.1074 |
| Model 2 + overall Life’s Essential 8 score | **1.04 (1.00, 1.09)** | Ref. | **1.08 (1.01, 1.15)** | 0.5913 |
| Model 2 + all Life’s Essential 8 components | 1.028 (0.99, 1.07) | Ref. | **1.08 (1.02, 1.15)** | 0.9292 |
| **Myocardial infarction (MI)** |  |  |  |  |
| Cases / person-years | 2121 / 844595 | 5472 / 2359955 | 736 / 287712 | 8329 / 3492262 |
| Model 1 * | 1.03 (0.98, 1.08) | Ref. | **1.21 (1.12, 1.31)** | 0.1456 |
| Model 2 † | 1.03 (0.98, 1.09) | Ref. | **1.21 (1.12, 1.30)** | 0.1832 |
| Model 2 + Life’s Essential 8 score | 1.05 (0.995, 1.10) | Ref. | 1.07 (0.99, 1.16) | 0.5348 |
| Model 2 + all Life’s Essential 8 components | 1.02 (0.97, 1.08) | Ref. | **1.08 (1.00, 1.17)** | 0.8855 |
| **Stroke** |  |  |  |  |
| Cases / person-years | 1310 / 848458 | 3311 / 2369892 | 429 / 289070 | 5050 / 3507420 |
| Model 1 * | 1.02 (0.96, 1.09) | Ref. | **1.18 (1.07, 1.31)** | 0.2237 |
| Model 2 † | 1.02 (0.96, 1.09) | Ref. | **1.18 (1.07, 1.30)** | 0.2601 |
| Model 2 + Life’s Essential 8 score | 1.04 (0.97, 1.11) | Ref. | 1.09 (0.98, 1.21) | 0.9233 |
| Model 2 + all Life’s Essential 8 components | 1.03 (0.97, 1.10 | Ref. | 1.09 (0.98, 1.21) | 0.8220 |
| * Model 1: adjusted for age, ethnic background, sex, Townsend deprivation index, education, family history of CVD.  † Model 2: adjusted for covariates in model 1 along with employment/shift work.  The Life's Essential 8 score and its individual components are continuous measures developed in accordance with the American Heart Association guidelines. They range from 0 to 100, where a higher point indicates better cardiovascular health. *P*-trend was calculated by modeling chronotype as a continuous variable ranging from 1 to 3.  Values in rows corresponding to models represent hazard ratios (95% CI) for the association between chronotype and outcome. | | | | |

| Supplemental Table 7. Chronotype and risk of stroke subtypes in UK Biobank, N = 322,777 | | | | |
| --- | --- | --- | --- | --- |
|  | Chronotype | | | *p*-trend |
|  | Definitely ‘morning’ | Intermediate | Definitely ‘evening’ |  |
| Ischemic stroke |  |  |  |  |
| Cases / person-years | 1474 / 1007422 | 3747 / 2815493 | 490 / 343074 | 5711 / 4165989 |
| Model 1 * | 1.01 (0.95, 1.08) | Ref. | **1.21 (1.10, 1.33)** | **0.0376** |
| Model 2 † | 1.02 (0.96, 1.08) | Ref. | **1.21 (1.10, 1.33)** | 0.0511 |
| Model 2 + Life’s Essential 8 score | 1.03 (0.97, 1.09) | Ref. | **1.11 (1.01, 1.22)** | 0.6266 |
| Model 2 + all Life’s Essential 8 components | 1.02 (0.96, 1.08) | Ref. | **1.11 (1.01, 1.22)** | 0.3615 |
| Intracerebral hemorrhage |  |  |  |  |
| Cases / person-years | 314 / 1012327 | 810 / 2827719 | 84 / 344735 | 1208 / 4184781 |
| Model 1 * | 1.00 (0.88, 1.14) | Ref. | 0.95 (0.76, 1.19) | 0.7740 |
| Model 2 † | 1.01 (0.88, 1.15) | Ref. | 0.95 (0.76, 1.19) | 0.7364 |
| Model 2 + Life’s Essential 8 score | 1.01 (0.89, 1.15) | Ref. | 0.91 (0.72, 1.14) | 0.4904 |
| Model 2 + all Life’s Essential 8 components | 1.01 (0.88, 1.15) | Ref. | 0.90 (0.72, 1.13) | 0.5131 |
| Subarachnoid hemorrhage |  |  |  |  |
| Cases / person-years | 187 / 1012400 | 471 / 2827890 | 74 / 344690 | 732 / 4184980 |
| Model 1 * | 1.05 (0.89, 1.24) | Ref. | **1.35 (1.05, 1.72)** | 0.3117 |
| Model 2 † | 1.05 (0.88, 1.24) | Ref. | **1.34 (1.05, 1.72)** | 0.3085 |
| Model 2 + Life’s Essential 8 score | 1.06 (0.89, 1.25) | Ref. | **1.29 (1.01, 1.65)** | 0.4518 |
| Model 2 + all Life’s Essential 8 components | 1.06 (0.89, 1.26) | Ref. | 1.26 (0.98, 1.61) | 0.5688 |
| * Model 1: adjusted for age, ethnic background, sex, Townsend deprivation index, education, family history of CVD.  † Model 2: adjusted for covariates in model 1 along with employment/shift work.  The Life's Essential 8 score and its individual components are continuous measures developed in accordance with the American Heart Association guidelines. They range from 0 to 100, where a higher point indicates better cardiovascular health. *P*-trend was calculated by modeling chronotype as a continuous variable ranging from 1 to 3.  Values in rows corresponding to models represent hazard ratios (95% CI) for the association between chronotype and outcome. | | | | |

| Supplemental Table 8. Chronotype and risk of myocardial infarction subtypes in UK Biobank, N = 322,777 | | | | |
| --- | --- | --- | --- | --- |
|  | Chronotype | | | *p*-trend |
|  | Definitely ‘morning’ | Intermediate | Definitely ‘evening’ |  |
| ST-Elevation MI |  |  |  |  |
| Cases / person-years | 694 / 1009444 | 1935 / 2819666 | 239 / 343692 | 2868 / 4172801 |
| Model 1 * | 0.98 (0.90, 1.07) | Ref. | 1.08 (0.95, 1.24) | 0.2375 |
| Model 2 † | 0.98 (0.90, 1.07) | Ref. | 1.08 (0.95, 1.24) | 0.2403 |
| Model 2 + Life’s Essential 8 score | 0.99 (0.91, 1.08) | Ref. | 0.97 (0.84, 1.11) | 0.8872 |
| Model 2 + all Life’s Essential 8 components | 0.99 (0.91, 1.08) | Ref. | 0.99 (0.86, 1.13) | 0.9084 |
| Non-ST-Elevation MI |  |  |  |  |
| Cases / person-years | 1469 / 1007301 | 3844 / 2813986 | 495 / 342853 | 5808 / 4164140 |
| Model 1 * | 1.02 (0.96, 1.08) | Ref. | **1.16 (1.06, 1.28)** | 0.1254 |
| Model 2 † | 1.02 (0.96, 1.08) | Ref. | **1.16 (1.05, 1.27)** | 0.1608 |
| Model 2 + Life’s Essential 8 score | 1.03 (0.97, 1.10) | Ref. | 1.02 (0.93, 1.12) | 0.5370 |
| Model 2 + all Life’s Essential 8 components | 1.01 (0.95, 1.08) | Ref. | 1.04 (0.95, 1.14) | 0.8423 |
| * Model 1: adjusted for age, ethnic background, sex, Townsend deprivation index, education, family history of CVD.  † Model 2: adjusted for covariates in model 1 along with employment/shift work.  The Life's Essential 8 score and its individual components are continuous measures developed in accordance with the American Heart Association guidelines. They range from 0 to 100, where a higher point indicates a healthier lifestyle. *P*-trend was calculated by modeling chronotype as a continuous variable ranging from 1 to 3.  Values in rows corresponding to models represent hazard ratios (95% CI) for the association between chronotype and outcome. | | | | |

| Supplemental Table 9. Mediation role of Life’s Essential 8 components on the chronotype and incident cardiovascular diseases association, N = 244,554 | | | | |
| --- | --- | --- | --- | --- |
|  | definitely evening versus intermediate chronotype | | |  |
|  | Total Effect | Natural Indirect Effect (mediated by LE8 component) | Natural Direct Effect | Proportion Mediated % |
| LE8 Components: Mediators* | HR (95% CI) | | |  |
| Nicotine exposure | **1.15 (1.09, 1.22)** | **1.05 (1.04, 1.06)** | **1.10 (1.04, 1.16)** | **33.8** |
| Sleep | **1.16 (1.10, 1.22)** | **1.02 (1.01, 1.03)** | **1.14 (1.07, 1.20)** | **13.7** |
| Blood glucose | **1.15 (1.09, 1.21)** | **1.02 (1.01, 1.02)** | **1.13 (1.07, 1.20)** | **12.2** |
| Body weight | **1.16 (1.10, 1.23)** | **1.02 (1.01, 1.02)** | **1.14 (1.08, 1.21)** | **11.1** |
| Diet | **1.15 (1.09, 1.22)** | **1.01 (1.01, 1.02)** | **1.14 (1.08, 1.20)** | **10.6** |
| Physical activity | **1.16 (1.09, 1.22)** | **1.01 (1.00, 1.02)** | **1.14 (1.08, 1.21)** | **8.3** |
| Blood pressure | **1.16 (1.09, 1.22)** | **1.01 (1.00, 1.01)** | **1.15 (1.09, 1.22)** | **4.0** |
| Blood lipid | **1.16 (1.10, 1.22)** | **1.00 (1.00, 1.01)** | **1.15 (1.09, 1.22)** | **3.5** |
| Adjusted for age, ethnic background, sex, Townsend deprivation index, education, family history of CVD along with employment/shift work.  * In mediation analyses, we used a reverse-coded version of LE8 scores with 0 showing healthiest lifestyle.  As associations with incident CVD were observed only for the “definitely evening” chronotype, compared to “intermediate,” the mediation analysis was limited to this comparison (N = 244,554). | | | | |

| Supplemental Table 10. Mediation role of Life’s Essential 8 overall score on the chronotype and different cardiovascular diseases associations, N = 244,554 | | | | |
| --- | --- | --- | --- | --- |
|  | definitely evening versus intermediate chronotype | | |  |
|  | Total effect | Natural indirect effect | Natural direct effect | Proportion mediated % |
| Outcomes* | HR (95% CI) | | |  |
| Myocardial infarction | **1.14 (1.07, 1.23)** | **1.13 (1.11, 1.15)** | 1.01 (0.94, 1.09) | **90.1** |
| Stroke | **1.18 (1.08, 1.28)** | **1.09 (1.06, 1.11)** | 1.08 (0.99, 1.19) | **52** |
| Confounders: Age, ethnic background, sex, Townsend deprivation index, education, family history of CVD along with employment/shift work.  * In mediation analyses, we used a reverse-coded version of LE8 scores with 0 showing healthiest lifestyle.  As associations with incident CVD were observed only for the “definitely evening” chronotype, compared to “intermediate,” the mediation analysis was limited to this comparison (N = 244,554). | | | | |

| Supplemental Table 11. Associations between chronotype and CVD risk among subgroups of the study sample, N = 322,777 | | | | | |
| --- | --- | --- | --- | --- | --- |
|  | Cases / Sample Size | Chronotype | | | *P-* interaction |
|  |  | Definite morning | Intermediate | Definite evening |  |
|  |  | HR (95% CI) | | |  |
| Age quartiles (years) |  |  |  |  | 0.1127 |
| ≤50.6 years old | 1956 / 87799 | 1.01 (0.90, 1.13) | Ref. | **1.16 (1.01, 1.33)** |  |
| >50.6 and ≤58.2 | 3374 / 82452 | 1.03 (0.95, 1.12) | Ref. | **1.20 (1.07, 1.34)** |  |
| >58.2 and ≤63.7 | 4922 / 79551 | 1.03 (0.97, 1.10) | Ref. | **1.24 (1.12, 1.37)** |  |
| >63.7 | 7332 / 72975 | 1.03 (0.98, 1.07) | Ref. | 1.04 (0.95, 1.15) |  |
| Sex |  |  |  |  | 0.2176 |
| Female | 5998 / 171008 | 0.98 (0.92, 1.04) | Ref. | **1.12 (1.02, 1.23)** |  |
| Male | 11586 / 151769 | **1.06 (1.01, 1.11)** | Ref. | **1.17 (1.10, 1.25)** |  |
| Employment/shift work |  |  |  |  | 0.9757 |
| Employed, never/rarely shift work | 5957 / 159674 | 1.03 (0.97, 1.10) | Ref. | **1.19 (1.09, 1.31)** |  |
| Employed, sometimes/usually/always shift work | 1381 / 29875 | 1.05 (0.93, 1.19) | Ref. | 1.14 (0.95, 1.35) |  |
| Retired/Other | 10246 / 133228 | 1.03 (0.98, 1.07) | Ref. | **1.14 (1.06, 1.22)** |  |
| Life's Essential 8 overall score |  |  |  |  | 0.2713 |
| <50 | 2589 / 23224 | 1.09 (0.99, 1.19) | Ref. | 1.01 (0.90, 1.14) |  |
| ≥50 | 14995 / 299553 | 1.03 (0.99, 1.07) | Ref. | **1.12 (1.05, 1.19)** |  |
| CVD polygenic risk score (PRS) tertiles |  |  |  |  | 0.4317 |
| Low PRS | 3992 / 103416 | 1.05 (0.98, 1.13) | Ref. | **1.15 (1.03, 1.29)** |  |
| Intermediate PRS | 5378 / 101980 | 1.03 (0.97, 1.10) | Ref. | **1.17 (1.06, 1.29)** |  |
| High PRS | 7354 / 100991 | 1.02 (0.96, 1.07) | Ref. | **1.16 (1.06, 1.26)** |  |
| Models were adjusted for age, ethnic background, sex, Townsend deprivation index, education, family history of CVD, and employment/shift work. We used continuous variables for age, Life’s Essential 8 overall score, and CVD PRS, while treating chronotype as a categorical variable in all interaction terms. In the subgroup analysis by age groups, we adjusted for the continuous age variable in the stratified models to minimize residual confounding from age.  Models incorporating CVD PRS as a subgroup covariate were further restricted to individuals with non-missing PRS values and a self-reported white ethnic background. Additionally, these models were adjusted for the first 10 principal components (sample size = 306,387).  CVD: Cardiovascular diseases. | | | | | |

| Supplemental Table 12. Chronotype and cardiovascular diseases risk in UK Biobank, N = 477,664 | | | | |
| --- | --- | --- | --- | --- |
|  | Chronotype  HR (95 CI) | | | *p*-trend |
|  | Definitely ‘morning’ | Intermediate | Definitely ‘evening’ |  |
| **Cardiovascular disease** |  |  |  |  |
| Cases / person-years | 6961 / 1461096 | 18095 / 4112528 | 2282 / 485138 | 27338 / 6058763 |
| Model 1 * | 1.02 (0.99, 1.05) | Ref. | **1.18 (1.13, 1.23)** | **0.0008** |
| Model 2 † | 1.02 (0.995, 1.05) | Ref. | **1.17 (1.12, 1.22)** | **0.0031** |
| **Myocardial infarction (MI)** |  |  |  |  |
| Cases / person-years | 4365 / 1470965 | 11352 / 4138912 | 1458 / 488304 | 17175 / 6098181 |
| Model 1 * | 1.03 (0.99, 1.07) | Ref. | **1.19 (1.13, 1.26)** | **0.0115** |
| Model 2 † | 1.03 (0.996, 1.07) | Ref. | **1.18 (1.12, 1.25)** | **0.0271** |
| **Stroke** |  |  |  |  |
| Cases / person-years | 2890 / 1479942 | 7502 / 4161038 | 934 / 491278 | 11326 / 6132257 |
| Model 1 * | 1.00 (0.96, 1.05) | Ref. | **1.17 (1.09, 1.25)** | **0.0060** |
| Model 2 † | 1.01 (0.96, 1.05) | Ref. | **1.17 (1.09, 1.25)** | **0.0119** |
| * Model 1: adjusted for age, ethnic background, sex, Townsend deprivation index, education, family history of CVD.  † Model 2: adjusted for covariates in model 1 along with employment/shift work.  *P*-trend was calculated by modeling chronotype as a continuous variable ranging from 1 to 3.  Values in rows corresponding to models represent hazard ratios (95% CI) for the association between chronotype and outcome.  Around 5% of the confounder values in models 1 and 2 were missing. We imputed these missing values using the median for continuous variables and the mode for categorical variables. Additionally, we excluded prevalent CVD cases from analyses.  Follow-up time was included as person-days in the Cox proportional hazards models. For the table, this was converted to person-years by dividing by 365.25. | | | | |

**REFERENCES**

Brown, Oliver I, Michael Drozd, Hugo McGowan, Marilena Giannoudi, Marcella Conning-Rowland, John Gierula, Sam Straw, Stephen B Wheatcroft, Katherine Bridge, and Lee D Roberts. 2023. 'Relationship among diabetes, obesity, and cardiovascular disease phenotypes: a UK biobank cohort study', *Diabetes Care*, 46: 1531-40.

Elghazaly, Hussein, Celeste McCracken, Liliana Szabo, James Malcolmson, Charlotte H Manisty, Alun H Davies, Stefan K Piechnik, Nicholas C Harvey, Stefan Neubauer, and Saidi A Mohiddin. 2023. 'Characterizing the hypertensive cardiovascular phenotype in the UK Biobank', *European Heart Journal-Cardiovascular Imaging*, 24: 1352-60.

Lloyd-Jones, D. M., N. B. Allen, C. A. M. Anderson, T. Black, L. C. Brewer, R. E. Foraker, M. A. Grandner, H. Lavretsky, A. M. Perak, G. Sharma, W. Rosamond, and Association American Heart. 2022. 'Life's Essential 8: Updating and Enhancing the American Heart Association's Construct of Cardiovascular Health: A Presidential Advisory From the American Heart Association', *Circulation*, 146: e18-e43.

Pazoki, Raha, Abbas Dehghan, Evangelos Evangelou, Helen Warren, He Gao, Mark Caulfield, Paul Elliott, and Ioanna Tzoulaki. 2018. 'Genetic predisposition to high blood pressure and lifestyle factors: associations with midlife blood pressure levels and cardiovascular events', *Circulation*, 137: 653-61.

Rutten-Jacobs, Loes CA, Susanna C Larsson, Rainer Malik, Kristiina Rannikmäe, Cathie L Sudlow, Martin Dichgans, Hugh S Markus, Matthew Traylor, and International Stroke Genetics Consortium. 2018. 'Genetic risk, incident stroke, and the benefits of adhering to a healthy lifestyle: cohort study of 306 473 UK Biobank participants', *Bmj*, 363.

Tikkanen, Emmi, Stefan Gustafsson, and Erik Ingelsson. 2018. 'Associations of fitness, physical activity, strength, and genetic risk with cardiovascular disease: longitudinal analyses in the UK Biobank Study', *Circulation*, 137: 2583-91.

UK Biobank. 2022. 'UK Biobank Algorithmically defined outcomes (ADOs)'. <https://biobank.ctsu.ox.ac.uk/crystal/refer.cgi?id=460>.

Wang, Mengying, Tao Zhou, Qiying Song, Hao Ma, Yonghua Hu, Yoriko Heianza, and Lu Qi. 2022. 'Ambient air pollution, healthy diet and vegetable intakes, and mortality: a prospective UK Biobank study', *International journal of epidemiology*, 51: 1243-53.

Wang, Xuan, Hao Ma, Xiang Li, Yoriko Heianza, JoAnn E Manson, Oscar H Franco, and Lu Qi. 2023. 'Association of cardiovascular health with life expectancy free of cardiovascular disease, diabetes, cancer, and dementia in UK adults', *JAMA Internal Medicine*, 183: 340-49.
